# Supplementary material for: RECQL4 Inhibits Radiation‐Induced Tumor Immune Awakening via Suppressing the cGAS‐STING Pathway in Hepatocellular Carcinoma
Source: PubMed Central journal article supplement (PMC11040365; doi:10.1002/advs.202308009), 2024-02-21

## Supporting Information

for *Adv. Sci.*, DOI 10.1002/adv.202308009

RECQL4 Inhibits Radiation-Induced Tumor Immune Awakening via Suppressing the cGAS-STING Pathway in Hepatocellular Carcinoma

*Weifeng Hong, Yang Zhang, Siwei Wang, Zongjuan Li, Danxue Zheng, Shujung Hsu, Jian Zhou, Jia Fan, Zhesheng Chen, Xiaojun Xia, Zhaochong Zeng, Qiang Gao\*, Min Yu\* and Shisuo Du\**

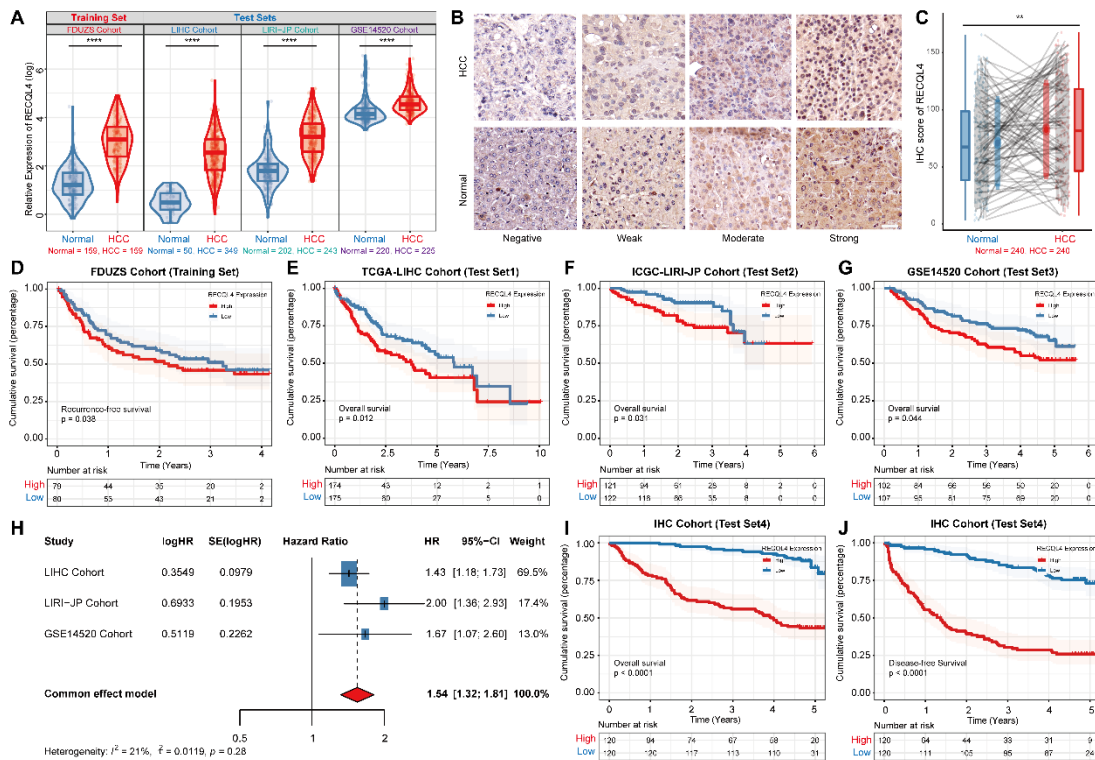

**Figure S1.** (A). Pie chart showing cell ratio of malignant and non-malignant cells detected by CopyKAT. (B–N). Density plot showing the expression distribution of 13 intersected genes in epithelial cells.

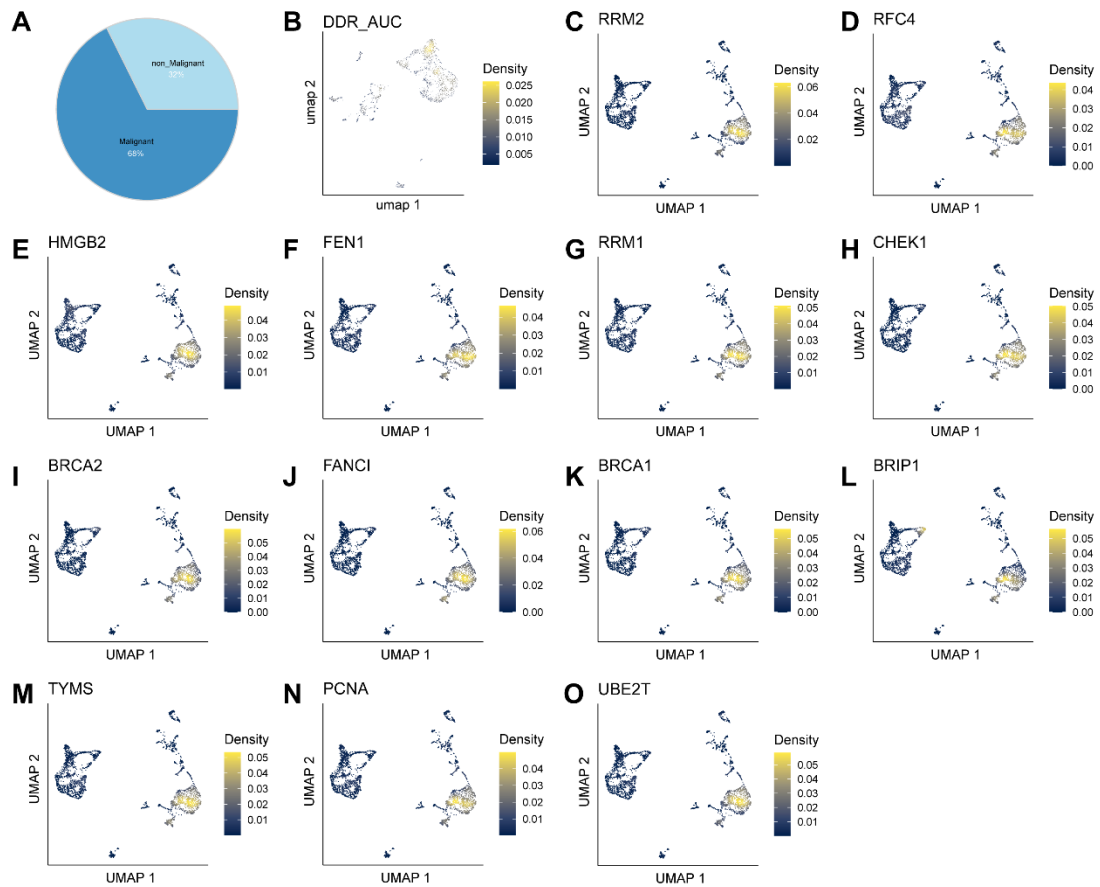

**Figure S2.** (A and B) qRT-PCR and Western blotting analyses show the relative expression of RECQL4 in eight cell lines. (C and D) qRT-PCR analysis shows the efficiency of stable transfection (overexpression and knockdown) of RECQL4.

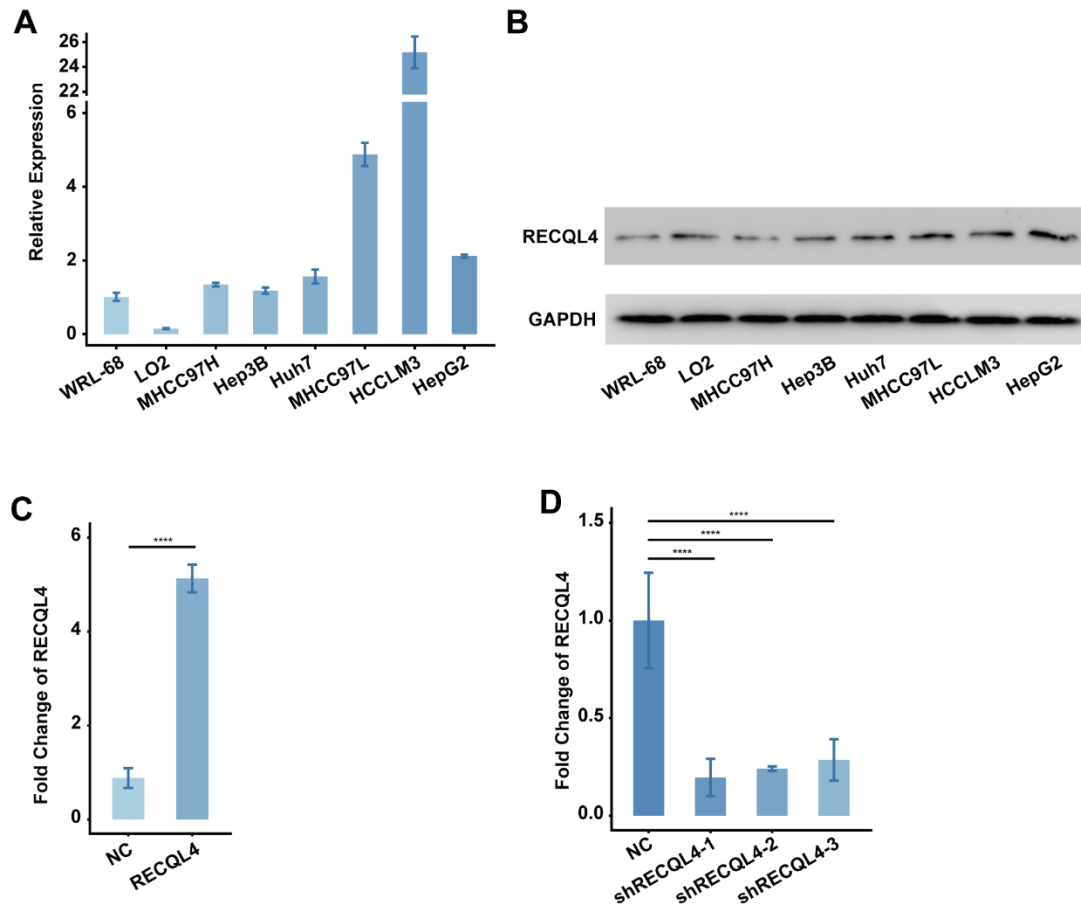

**Figure S3.** (A) Workflow of subcutaneous HCC transplantation RT model in mice. HCC cells were injected subcutaneously, and when the tumor volume reached ~100 mm<sup>3</sup>, mice received 8 Gy radiation for three consecutive days. (B) Workflow of subcutaneous HCC transplantation RT model in mice. (C) Bioluminescence images of C57BL/6 mouse HCC tumors.

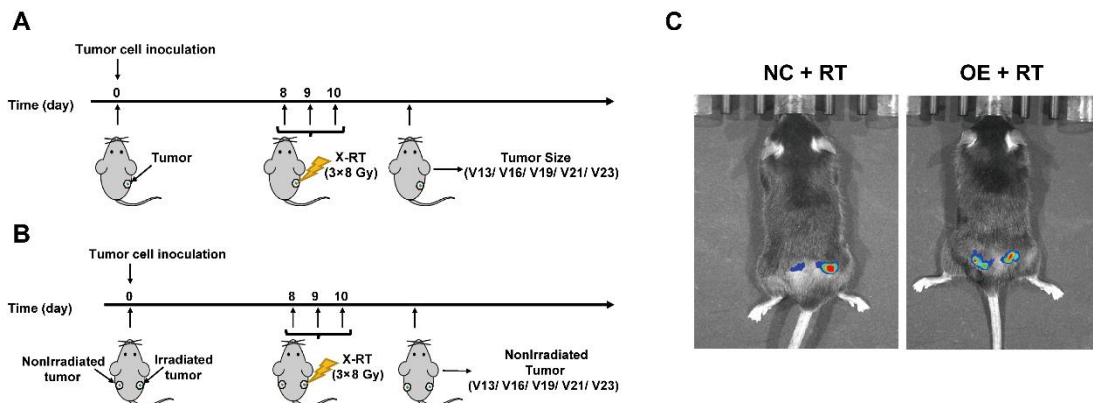

**Figure S4.** The expression distribution of marker genes in immune cells.

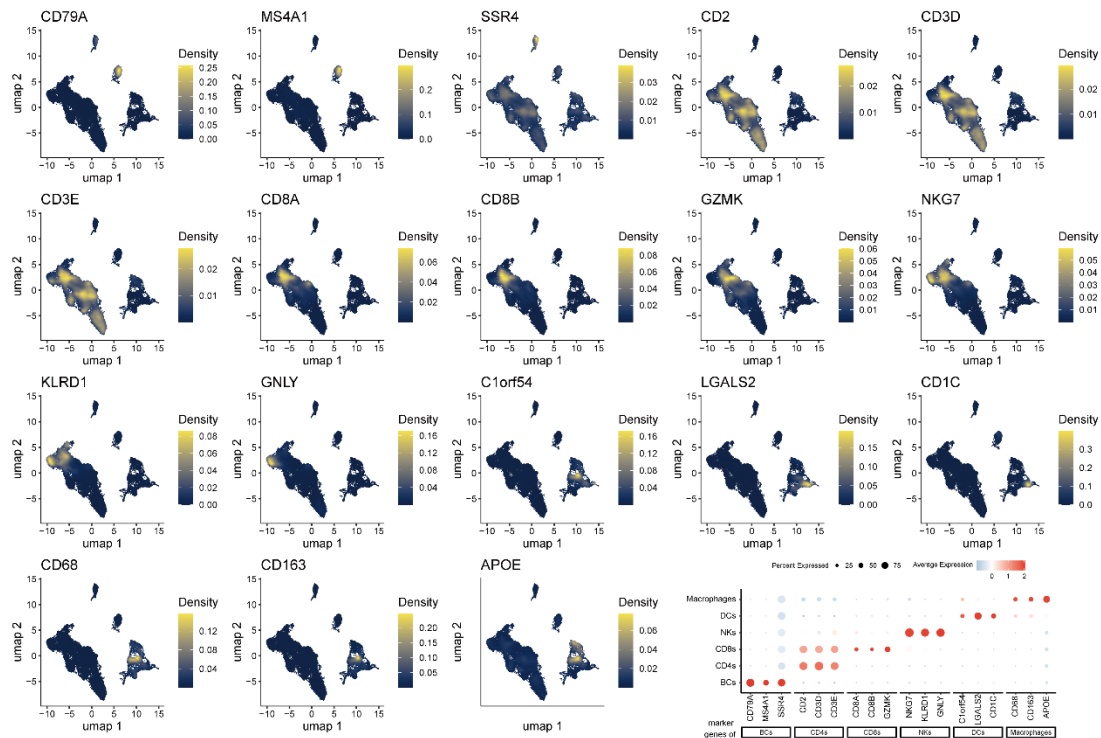

**Figure S5.** (A) Flow cytometric analysis of tumor-infiltrating CD3<sup>+</sup> T cell population (Live/CD45<sup>+</sup>/CD3<sup>+</sup> cells), CD8<sup>+</sup> T cell population (Live/CD45/CD3/CD8/CD69), and antigen-specific dendritic cells (CD45<sup>+</sup>/CD11c<sup>+</sup>/SIINFEKL<sup>+</sup> cells/CD80) in STING-deficient mice tumor tissue and draining lymph nodes. (B) Representative image of ELISPOT assay detecting IFN- $\gamma$  secretion in STING-mutation mice. (C) Flow cytometric analysis of tumor-infiltrating CD3<sup>+</sup> T cell population, CD8<sup>+</sup> T cell population, and antigen-specific dendritic cells in cGAS-deficient mice tumor tissue and draining lymph nodes. (D) Representative image of ELISPOT assay detecting IFN- $\gamma$  secretion in cGAS-KO mice.

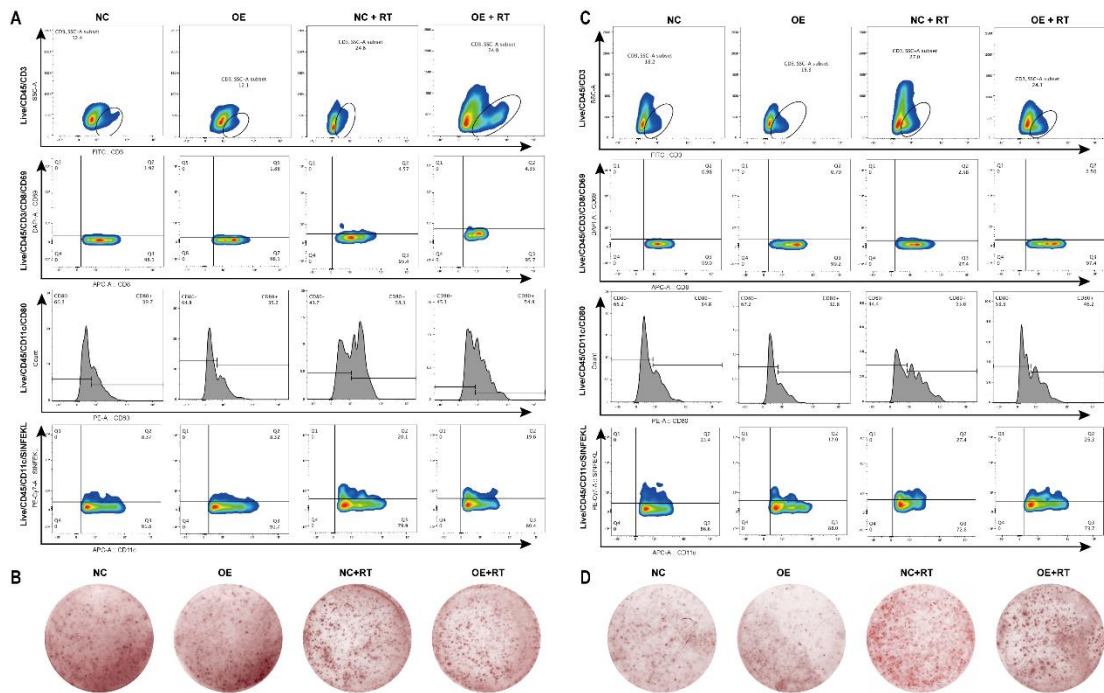

**Figure S6.** (A–D) qRT-PCR quantification of CD80 (A), CD86 (B), CXCL10 (C), and IFN- $\beta$  (D) expression in tumor-draining lymph node tissue. (E and F) Purified CD11c<sup>+</sup> DCs were co-cultured with initial CD8<sup>+</sup> T cells, and IFN- $\gamma$  secretion was detected by ELISPOT assay. The representative data shown are from six mice per group. Data are presented as mean  $\pm$  SEM.

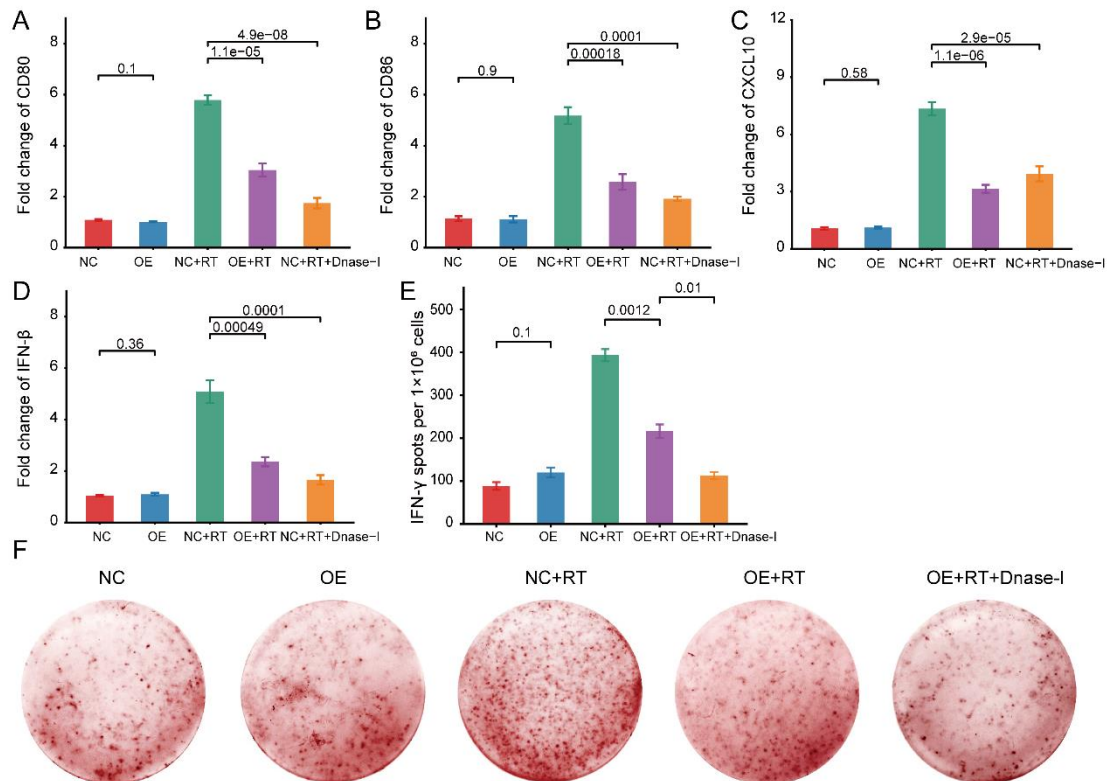

**Figure S7.** Representative images and statistical analysis of RECQL4 IHC staining intensity in HCC to the combined therapy of SBRT and immunotherapy (left panel). Scale bar, 50  $\mu$ m. Proportional graph of responsiveness by high or low RECQL4 expression (right panel). CR, complete response; PR, partial response; SD, stable disease; PD, progressive disease.

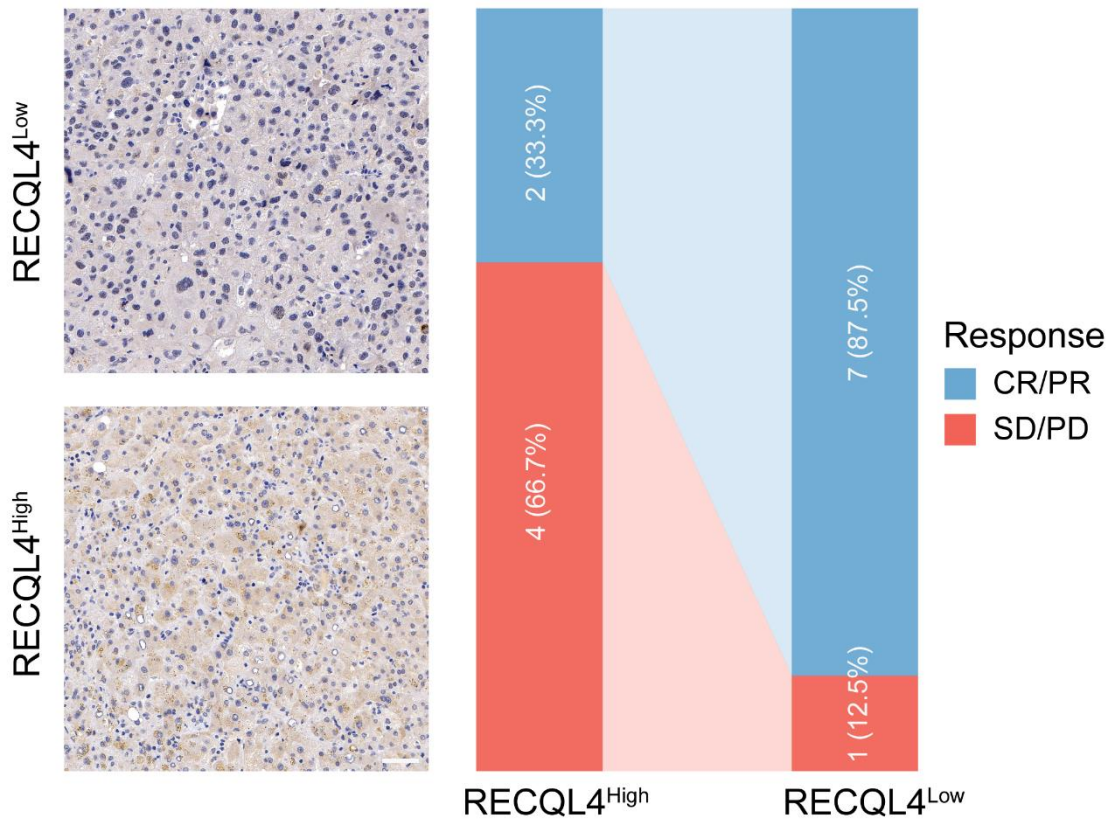

Supplement: ADVS-11-2308009-s001.pdf [file ADVS-11-2308009-s001.pdf]
